# Supplementary material
Source: PubMed Central journal article supplement (PMC6029549)
Supplement: 2018_196543-Disclosures_and_Contributions.pdf [file 2018_196543-Disclosures_and_Contributions.pdf]

Haematologica  
HAEMATOL/2018/196543  
Version 2

Immune failure, infection and survival in chronic lymphocytic leukaemia.

Kyle R Crassini, O Giles Best, and Stephen P Mulligan

Disclosures: Nothing to disclose

Contributions: KC, OB and SM performed research, data analysis and wrote the manuscript.
